# Supplementary material for: On the energetic stability of halogen bonds involving metals: implications in crystal engineering
Source: Royal Society of Chemistry journal article supplement (doi:10.1039/d2ce00545j), 2022-01-01
Supplement: d2ce00545j1.pdf [file d2ce00545j1.pdf]

**ESI for Manuscript:**

**On the energetic stability of halogen bonds involving metals: implications in  
crystal engineering**

Ismael Benito,<sup>a</sup> Rosa M. Gomila<sup>a</sup> and Antonio Frontera\*<sup>a</sup>

*Departament de Química, Universitat de les Illes Balears, Crta. de Valldemossa km 7.5,  
07122 Palma, Spain.*

**Cartesian Coordinates**

**7**

|    |           |           |           |
|----|-----------|-----------|-----------|
| 6  | 1.206984  | 2.501141  | 2.986661  |
| 1  | 2.135651  | 3.083113  | 2.967357  |
| 6  | -0.000000 | 3.187369  | 2.948119  |
| 1  | -0.000000 | 4.266689  | 2.895773  |
| 6  | -1.206984 | 2.501141  | 2.986661  |
| 1  | -2.135651 | 3.083113  | 2.967357  |
| 8  | 1.365699  | 1.253172  | 3.045664  |
| 8  | -1.365699 | 1.253172  | 3.045664  |
| 6  | 1.206984  | -2.501141 | 2.986661  |
| 1  | 2.135651  | -3.083113 | 2.967357  |
| 6  | -0.000000 | -3.187369 | 2.948119  |
| 1  | -0.000000 | -4.266689 | 2.895773  |
| 6  | -1.206984 | -2.501141 | 2.986661  |
| 1  | -2.135651 | -3.083113 | 2.967357  |
| 8  | 1.365699  | -1.253172 | 3.045664  |
| 8  | -1.365699 | -1.253172 | 3.045664  |
| 6  | 0.000000  | 0.000000  | -4.814305 |
| 6  | -0.000000 | 1.199446  | -4.120472 |
| 6  | -0.000000 | 1.195523  | -2.735375 |
| 6  | 0.000000  | 0.000000  | -2.027503 |
| 6  | -0.000000 | -1.195523 | -2.735375 |
| 6  | -0.000000 | -1.199446 | -4.120472 |
| 9  | 0.000000  | -2.351958 | -2.094865 |
| 9  | 0.000000  | -2.344990 | -4.782999 |
| 9  | 0.000000  | 0.000000  | -6.135859 |
| 9  | 0.000000  | 2.344990  | -4.782999 |
| 9  | 0.000000  | 2.351958  | -2.094865 |
| 17 | 0.000000  | 0.000000  | -0.323203 |
| 28 | 0.000000  | -0.000000 | 3.059294  |

**8**

|   |           |           |           |
|---|-----------|-----------|-----------|
| 6 | -1.206425 | 2.496711  | -3.041018 |
| 1 | -2.135621 | 3.077528  | -3.020354 |
| 6 | 0.000000  | 3.183144  | -2.999670 |
| 1 | 0.000000  | 4.262221  | -2.943521 |
| 6 | 1.206425  | 2.496711  | -3.041018 |
| 1 | 2.135621  | 3.077528  | -3.020354 |
| 8 | -1.364027 | 1.248763  | -3.104037 |
| 8 | 1.364027  | 1.248763  | -3.104037 |
| 6 | -1.206425 | -2.496711 | -3.041018 |

|    |           |           |           |
|----|-----------|-----------|-----------|
| 1  | -2.135621 | -3.077528 | -3.020354 |
| 6  | -0.000000 | -3.183144 | -2.999670 |
| 1  | -0.000000 | -4.262221 | -2.943521 |
| 6  | 1.206425  | -2.496711 | -3.041018 |
| 1  | 2.135621  | -3.077528 | -3.020354 |
| 8  | -1.364027 | -1.248763 | -3.104037 |
| 8  | 1.364027  | -1.248763 | -3.104037 |
| 6  | 0.000000  | 0.000000  | 4.861604  |
| 6  | 0.000000  | 1.199471  | 4.167974  |
| 6  | 0.000000  | 1.194525  | 2.782621  |
| 6  | 0.000000  | 0.000000  | 2.075754  |
| 6  | -0.000000 | -1.194525 | 2.782621  |
| 6  | -0.000000 | -1.199471 | 4.167974  |
| 35 | 0.000000  | 0.000000  | 0.208112  |
| 9  | -0.000000 | -2.354662 | 2.147504  |
| 9  | -0.000000 | -2.344825 | 4.831287  |
| 9  | 0.000000  | 0.000000  | 6.183068  |
| 9  | 0.000000  | 2.344825  | 4.831287  |
| 9  | 0.000000  | 2.354662  | 2.147504  |
| 28 | 0.000000  | -0.000000 | -3.117962 |

**9**

|    |           |           |           |
|----|-----------|-----------|-----------|
| 6  | -1.206054 | 2.495472  | -3.112579 |
| 1  | -2.135698 | 3.075038  | -3.090232 |
| 6  | 0.000000  | 3.181596  | -3.066016 |
| 1  | 0.000000  | 4.260238  | -3.003293 |
| 6  | 1.206054  | 2.495472  | -3.112579 |
| 1  | 2.135698  | 3.075038  | -3.090232 |
| 8  | -1.363035 | 1.247392  | -3.182463 |
| 8  | 1.363035  | 1.247392  | -3.182463 |
| 6  | -1.206054 | -2.495472 | -3.112579 |
| 1  | -2.135698 | -3.075038 | -3.090232 |
| 6  | -0.000000 | -3.181596 | -3.066016 |
| 1  | -0.000000 | -4.260238 | -3.003293 |
| 6  | 1.206054  | -2.495472 | -3.112579 |
| 1  | 2.135698  | -3.075038 | -3.090232 |
| 8  | -1.363035 | -1.247392 | -3.182463 |
| 8  | 1.363035  | -1.247392 | -3.182463 |
| 6  | 0.000000  | 0.000000  | 4.973075  |
| 6  | 0.000000  | 1.199254  | 4.279264  |
| 6  | 0.000000  | 1.191457  | 2.893899  |
| 6  | 0.000000  | 0.000000  | 2.183270  |
| 6  | -0.000000 | -1.191457 | 2.893899  |
| 6  | -0.000000 | -1.199254 | 4.279264  |
| 9  | 0.000000  | -2.357147 | 2.264407  |
| 9  | 0.000000  | -2.344744 | 4.943653  |
| 9  | 0.000000  | 0.000000  | 6.294738  |
| 9  | 0.000000  | 2.344744  | 4.943653  |
| 9  | 0.000000  | 2.357147  | 2.264407  |
| 53 | 0.000000  | 0.000000  | 0.108365  |
| 28 | 0.000000  | 0.000000  | -3.194881 |

**10**

|   |           |          |          |
|---|-----------|----------|----------|
| 6 | 1.228983  | 2.582948 | 2.746108 |
| 1 | 2.128677  | 3.208989 | 2.726316 |
| 6 | -0.000000 | 3.234549 | 2.713441 |
| 1 | -0.000000 | 4.314939 | 2.667399 |
| 6 | -1.228983 | 2.582948 | 2.746108 |
| 1 | -2.128677 | 3.208989 | 2.726316 |
| 8 | 1.458552  | 1.346506 | 2.798342 |
| 8 | -1.458552 | 1.346506 | 2.798342 |

|    |           |           |           |
|----|-----------|-----------|-----------|
| 6  | 1.228983  | -2.582948 | 2.746108  |
| 1  | 2.128677  | -3.208989 | 2.726316  |
| 6  | -0.000000 | -3.234549 | 2.713441  |
| 1  | -0.000000 | -4.314939 | 2.667399  |
| 6  | -1.228983 | -2.582948 | 2.746108  |
| 1  | -2.128677 | -3.208989 | 2.726316  |
| 8  | 1.458552  | -1.346506 | 2.798342  |
| 8  | -1.458552 | -1.346506 | 2.798342  |
| 6  | 0.000000  | 0.000000  | -5.076991 |
| 6  | 0.000000  | 1.199404  | -4.383109 |
| 6  | 0.000000  | 1.195293  | -2.998022 |
| 6  | 0.000000  | 0.000000  | -2.289853 |
| 6  | -0.000000 | -1.195293 | -2.998022 |
| 6  | -0.000000 | -1.199404 | -4.383109 |
| 9  | 0.000000  | -2.352045 | -2.357662 |
| 9  | 0.000000  | -2.345037 | -5.045687 |
| 9  | 0.000000  | 0.000000  | -6.398655 |
| 9  | 0.000000  | 2.345037  | -5.045687 |
| 9  | 0.000000  | 2.352045  | -2.357662 |
| 46 | -0.000000 | 0.000000  | 2.811059  |
| 17 | 0.000000  | 0.000000  | -0.584751 |

**11**

|    |           |           |           |
|----|-----------|-----------|-----------|
| 6  | 1.228884  | 2.581999  | 2.851035  |
| 1  | 2.128747  | 3.207493  | 2.829116  |
| 6  | 0.000000  | 3.233286  | 2.815339  |
| 1  | 0.000000  | 4.313420  | 2.764038  |
| 6  | -1.228884 | 2.581999  | 2.851035  |
| 1  | -2.128747 | 3.207493  | 2.829116  |
| 8  | 1.458414  | 1.345521  | 2.908573  |
| 8  | -1.458414 | 1.345521  | 2.908573  |
| 6  | 1.228884  | -2.581999 | 2.851035  |
| 1  | 2.128747  | -3.207493 | 2.829116  |
| 6  | -0.000000 | -3.233286 | 2.815339  |
| 1  | -0.000000 | -4.313420 | 2.764038  |
| 6  | -1.228884 | -2.581999 | 2.851035  |
| 1  | -2.128747 | -3.207493 | 2.829116  |
| 8  | 1.458414  | -1.345521 | 2.908573  |
| 8  | -1.458414 | -1.345521 | 2.908573  |
| 6  | 0.000000  | 0.000000  | -5.146279 |
| 6  | 0.000000  | 1.199429  | -4.452577 |
| 6  | 0.000000  | 1.194251  | -3.067227 |
| 6  | 0.000000  | 0.000000  | -2.359998 |
| 6  | -0.000000 | -1.194251 | -3.067227 |
| 6  | -0.000000 | -1.199429 | -4.452577 |
| 35 | 0.000000  | 0.000000  | -0.491387 |
| 9  | 0.000000  | -2.354726 | -2.432318 |
| 9  | 0.000000  | -2.344863 | -5.115914 |
| 9  | 0.000000  | 0.000000  | -6.467817 |
| 9  | 0.000000  | 2.344863  | -5.115914 |
| 9  | 0.000000  | 2.354726  | -2.432318 |
| 46 | 0.000000  | -0.000000 | 2.922273  |

**12**

|   |           |          |           |
|---|-----------|----------|-----------|
| 6 | -1.228521 | 2.581894 | -2.932070 |
| 1 | -2.128867 | 3.206218 | -2.907140 |
| 6 | 0.000000  | 3.232920 | -2.890174 |
| 1 | 0.000000  | 4.312518 | -2.830168 |
| 6 | 1.228521  | 2.581894 | -2.932070 |
| 1 | 2.128867  | 3.206218 | -2.907140 |
| 8 | -1.457699 | 1.345420 | -2.998841 |

|    |           |           |           |
|----|-----------|-----------|-----------|
| 8  | 1.457699  | 1.345420  | -2.998841 |
| 6  | -1.228521 | -2.581894 | -2.932070 |
| 1  | -2.128867 | -3.206218 | -2.907140 |
| 6  | -0.000000 | -3.232920 | -2.890174 |
| 1  | -0.000000 | -4.312518 | -2.830168 |
| 6  | 1.228521  | -2.581894 | -2.932070 |
| 1  | 2.128867  | -3.206218 | -2.907140 |
| 8  | -1.457699 | -1.345420 | -2.998841 |
| 8  | 1.457699  | -1.345420 | -2.998841 |
| 6  | 0.000000  | 0.000000  | 5.240793  |
| 6  | 0.000000  | 1.199204  | 4.546928  |
| 6  | 0.000000  | 1.191068  | 3.161559  |
| 6  | 0.000000  | 0.000000  | 2.450535  |
| 6  | -0.000000 | -1.191068 | 3.161559  |
| 6  | -0.000000 | -1.199204 | 4.546928  |
| 9  | -0.000000 | -2.357194 | 2.532272  |
| 9  | -0.000000 | -2.344785 | 5.211425  |
| 9  | 0.000000  | 0.000000  | 6.562581  |
| 9  | 0.000000  | 2.344785  | 5.211425  |
| 9  | 0.000000  | 2.357194  | 2.532272  |
| 53 | 0.000000  | 0.000000  | 0.372898  |
| 46 | 0.000000  | -0.000000 | -3.012165 |

**13**

|    |           |           |           |
|----|-----------|-----------|-----------|
| 6  | 1.232195  | 2.579161  | 2.421225  |
| 1  | 2.131435  | 3.202563  | 2.407550  |
| 6  | 0.000000  | 3.223250  | 2.398830  |
| 1  | 0.000000  | 4.304320  | 2.366668  |
| 6  | -1.232195 | 2.579161  | 2.421225  |
| 1  | -2.131435 | 3.202563  | 2.407550  |
| 8  | 1.466916  | 1.338652  | 2.457409  |
| 8  | -1.466916 | 1.338652  | 2.457409  |
| 6  | 1.232195  | -2.579161 | 2.421225  |
| 1  | 2.131435  | -3.202563 | 2.407550  |
| 6  | -0.000000 | -3.223250 | 2.398830  |
| 1  | -0.000000 | -4.304320 | 2.366668  |
| 6  | -1.232195 | -2.579161 | 2.421225  |
| 1  | -2.131435 | -3.202563 | 2.407550  |
| 8  | 1.466916  | -1.338652 | 2.457409  |
| 8  | -1.466916 | -1.338652 | 2.457409  |
| 6  | -0.000000 | -0.000000 | -5.471178 |
| 6  | 0.000000  | 1.199239  | -4.777094 |
| 6  | 0.000000  | 1.194825  | -3.392018 |
| 6  | -0.000000 | -0.000000 | -2.683008 |
| 6  | -0.000000 | -1.194825 | -3.392018 |
| 6  | -0.000000 | -1.199239 | -4.777094 |
| 9  | -0.000000 | -2.352136 | -2.752081 |
| 9  | -0.000000 | -2.345085 | -5.439681 |
| 9  | -0.000000 | -0.000000 | -6.793036 |
| 9  | 0.000000  | 2.345085  | -5.439681 |
| 9  | 0.000000  | 2.352136  | -2.752081 |
| 78 | 0.000000  | 0.000000  | 2.464911  |
| 17 | -0.000000 | -0.000000 | -0.977387 |

**14**

|   |           |          |          |
|---|-----------|----------|----------|
| 6 | 1.232000  | 2.578759 | 2.516786 |
| 1 | 2.131454  | 3.201635 | 2.501502 |
| 6 | 0.000000  | 3.222747 | 2.490853 |
| 1 | 0.000000  | 4.303582 | 2.453270 |
| 6 | -1.232000 | 2.578759 | 2.516786 |
| 1 | -2.131454 | 3.201635 | 2.501502 |

|    |           |           |           |
|----|-----------|-----------|-----------|
| 8  | 1.466606  | 1.338274  | 2.558511  |
| 8  | -1.466606 | 1.338274  | 2.558511  |
| 6  | 1.232000  | -2.578759 | 2.516786  |
| 1  | 2.131454  | -3.201635 | 2.501502  |
| 6  | -0.000000 | -3.222747 | 2.490853  |
| 1  | -0.000000 | -4.303582 | 2.453270  |
| 6  | -1.232000 | -2.578759 | 2.516786  |
| 1  | -2.131454 | -3.201635 | 2.501502  |
| 8  | 1.466606  | -1.338274 | 2.558511  |
| 8  | -1.466606 | -1.338274 | 2.558511  |
| 6  | 0.000000  | 0.000000  | -5.497818 |
| 6  | 0.000000  | 1.199252  | -4.803964 |
| 6  | 0.000000  | 1.193629  | -3.418621 |
| 6  | 0.000000  | 0.000000  | -2.710594 |
| 6  | -0.000000 | -1.193629 | -3.418621 |
| 6  | -0.000000 | -1.199252 | -4.803964 |
| 35 | 0.000000  | 0.000000  | -0.838883 |
| 9  | 0.000000  | -2.354831 | -2.784104 |
| 9  | 0.000000  | -2.344928 | -5.467555 |
| 9  | 0.000000  | 0.000000  | -6.819689 |
| 9  | 0.000000  | 2.344928  | -5.467555 |
| 9  | 0.000000  | 2.354831  | -2.784104 |
| 78 | 0.000000  | -0.000000 | 2.565532  |

**15**

|    |           |           |           |
|----|-----------|-----------|-----------|
| 6  | 1.231696  | 2.578994  | 2.582183  |
| 1  | 2.131494  | 3.200899  | 2.564902  |
| 6  | 0.000000  | 3.222523  | 2.549275  |
| 1  | 0.000000  | 4.302904  | 2.502370  |
| 6  | -1.231696 | 2.578994  | 2.582183  |
| 1  | -2.131494 | 3.200899  | 2.564902  |
| 8  | 1.466386  | 1.338435  | 2.633525  |
| 8  | -1.466386 | 1.338435  | 2.633525  |
| 6  | 1.231696  | -2.578994 | 2.582183  |
| 1  | 2.131494  | -3.200899 | 2.564902  |
| 6  | -0.000000 | -3.222523 | 2.549275  |
| 1  | -0.000000 | -4.302904 | 2.502370  |
| 6  | -1.231696 | -2.578994 | 2.582183  |
| 1  | -2.131494 | -3.200899 | 2.564902  |
| 8  | 1.466386  | -1.338435 | 2.633525  |
| 8  | -1.466386 | -1.338435 | 2.633525  |
| 6  | 0.000000  | 0.000000  | -5.550010 |
| 6  | 0.000000  | 1.199018  | -4.855959 |
| 6  | 0.000000  | 1.189908  | -3.470577 |
| 6  | 0.000000  | 0.000000  | -2.758471 |
| 6  | -0.000000 | -1.189908 | -3.470577 |
| 6  | -0.000000 | -1.199018 | -4.855959 |
| 9  | 0.000000  | -2.357333 | -2.841718 |
| 9  | 0.000000  | -2.344960 | -5.520939 |
| 9  | 0.000000  | 0.000000  | -6.872326 |
| 9  | 0.000000  | 2.344960  | -5.520939 |
| 9  | 0.000000  | 2.357333  | -2.841718 |
| 53 | 0.000000  | 0.000000  | -0.672233 |
| 78 | 0.000000  | -0.000000 | 2.636866  |
